# Supplementary material for: The potential benefit of metformin to reduce delirium risk and mortality: a retrospective cohort study
Source: publisher site journal article supplement (doi:10.18632/aging.204393), 2022-11-17
Supplement: Supplementary file [file aging-v14i22-204393-supplementary-material-SD1.pdf]

SUPPLEMENTARY FIGURES

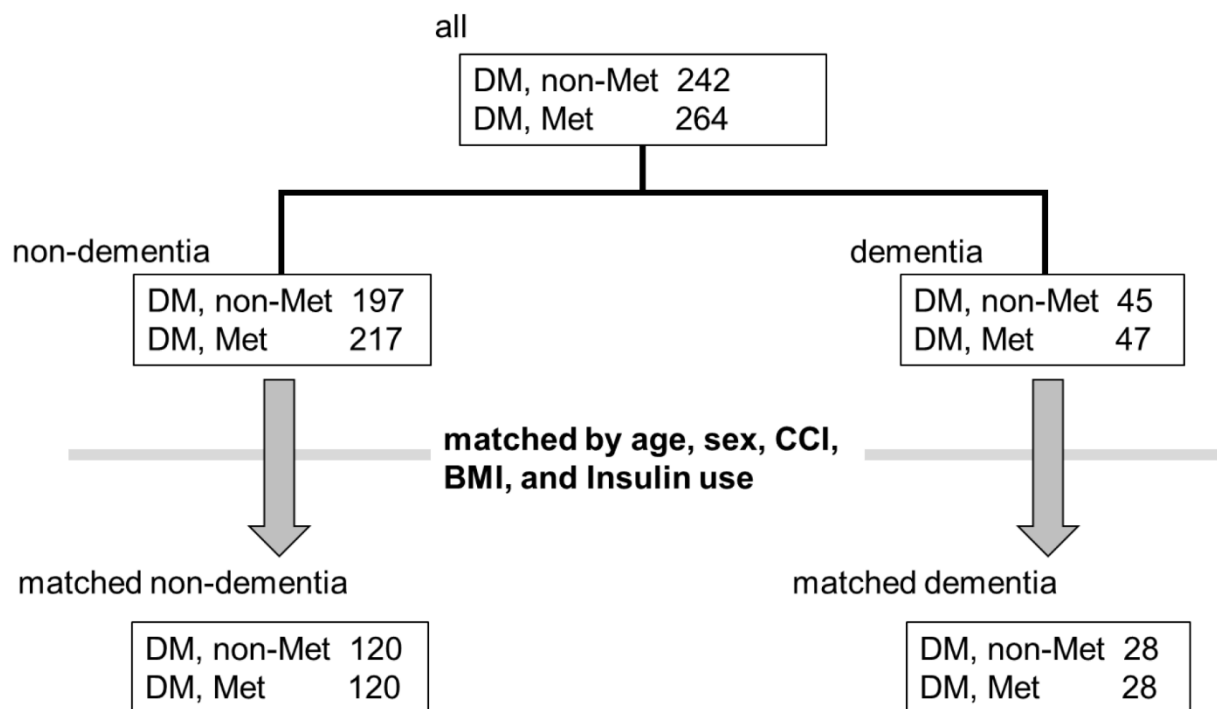

Supplementary Figure 1. Propensity score matching process.

**A** female

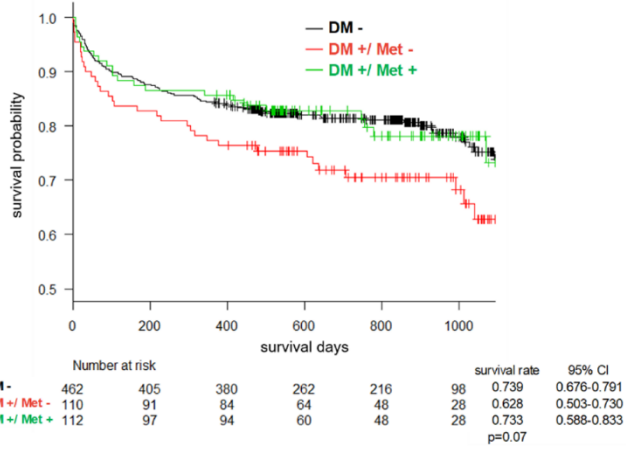

**B** male

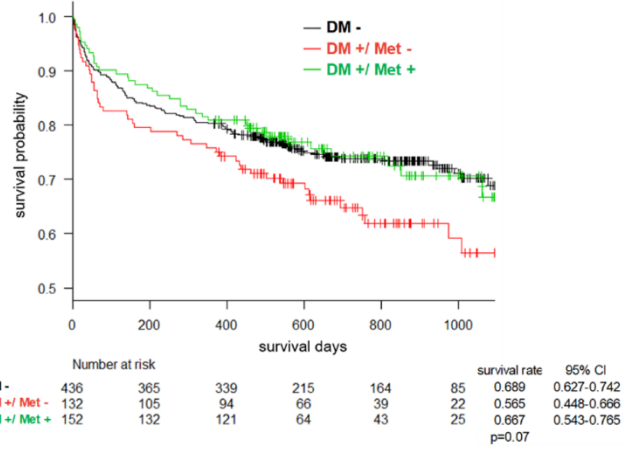

**C** age < 65

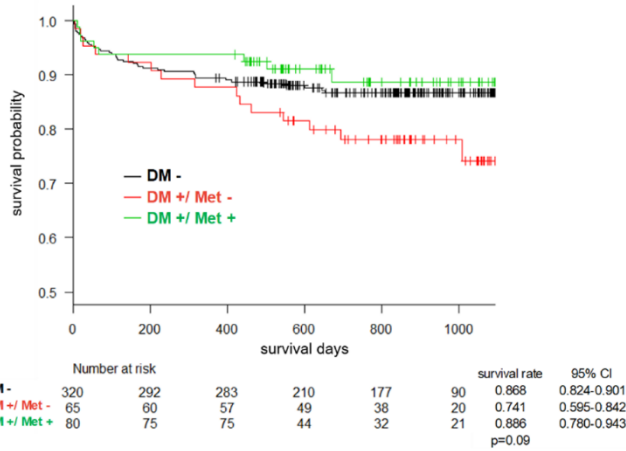

**D** age ≥ 65

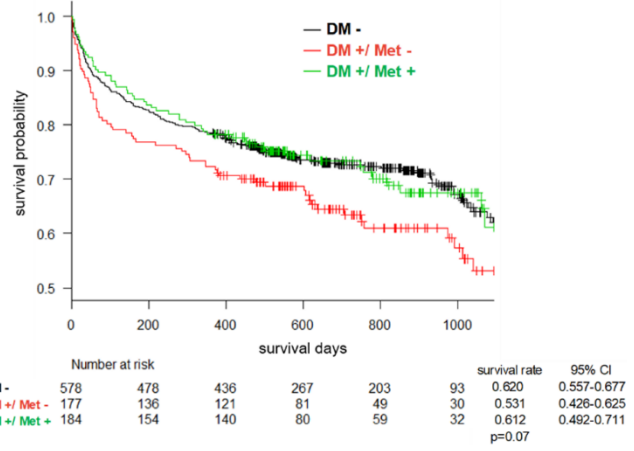

**Supplementary Figure 2.** Kaplan-Meier cumulative survival curve over 3 years based on (A) female only cohort, (B) male only cohort, (C) age <65 years cohort, (D) age ≥65 years cohort.

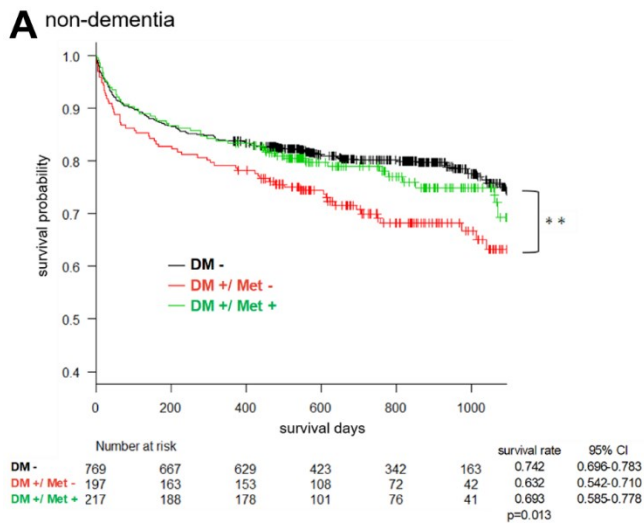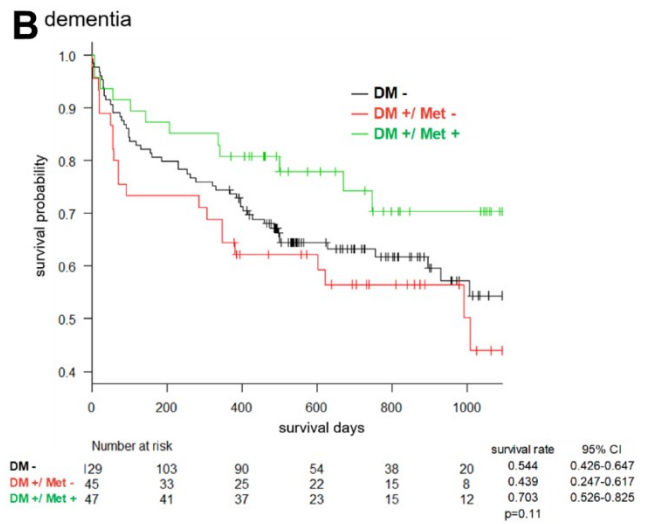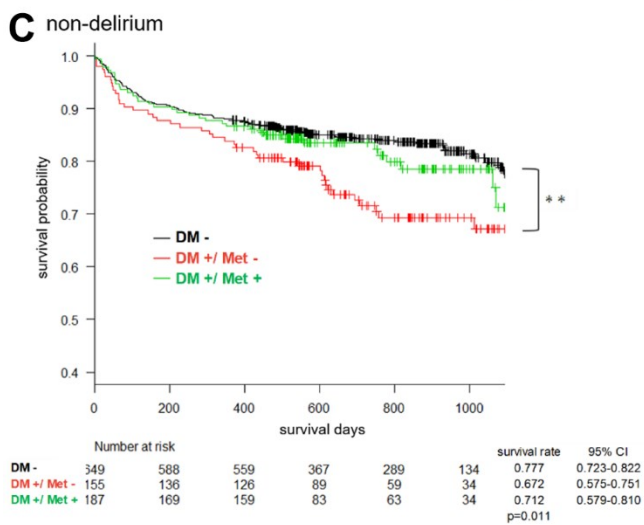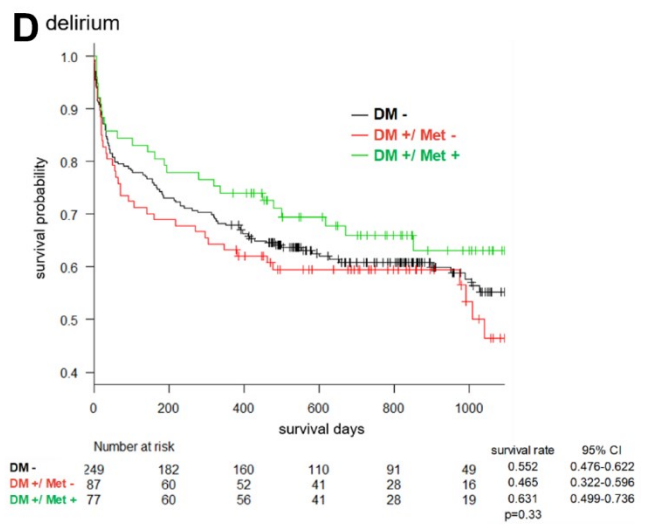

**Supplementary Figure 3.** Kaplan-Meier cumulative survival curve over 3 years based on (A) non-dementia cohort, (B) dementia cohort, (C) non-delirium cohort, (D) delirium cohort. \*\* p<0.01.

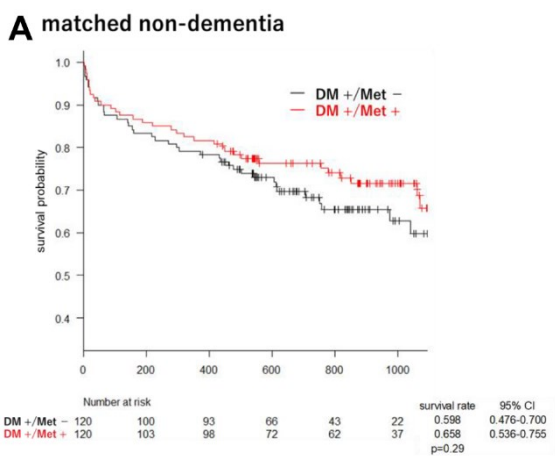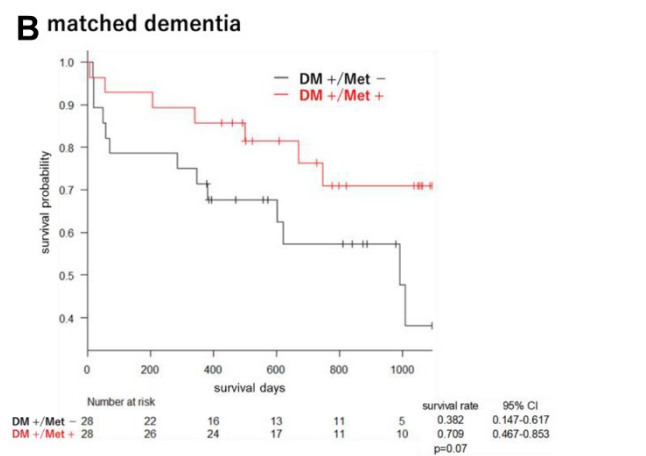

**Supplementary Figure 4.** Kaplan-Meier cumulative survival curve over 3 years based on (A) matched non-dementia cohort and (B) matched dementia cohort.
